# Supplementary material
Source: Research Square preprint supplement (doi:10.21203/rs.3.rs-8827280/v1)
Supplement: Supplementary file 1 [file cbe7aaadd2de7acdba117f6e.docx]

**
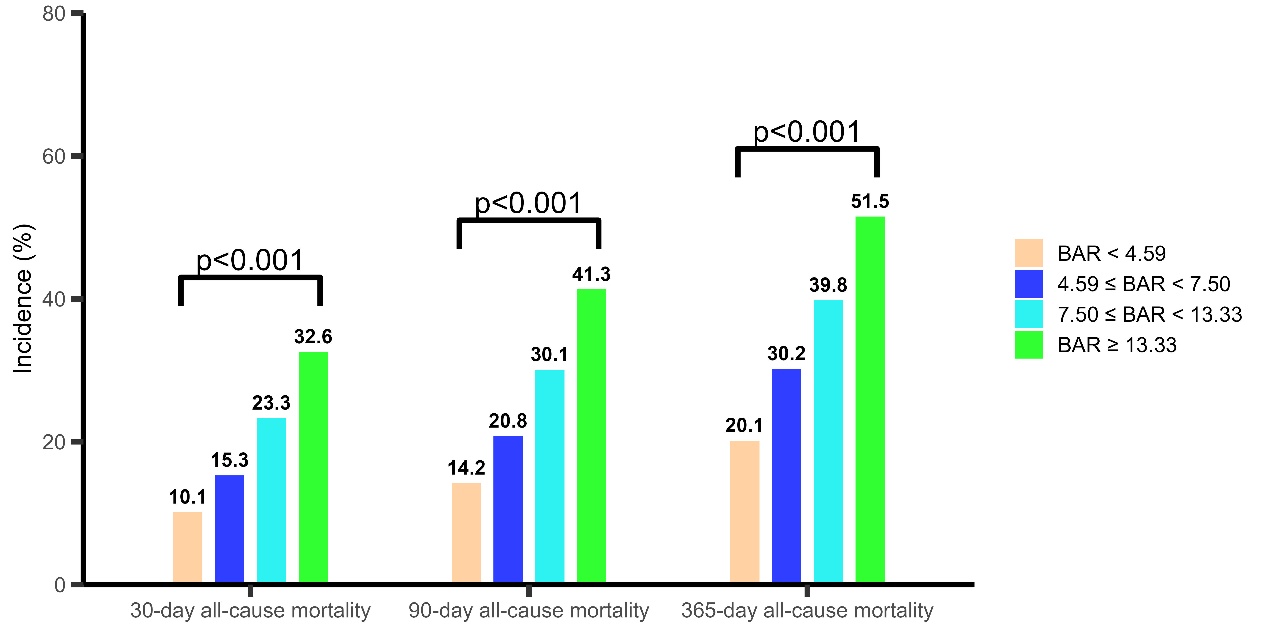
**

**Figure S1.** The 30-day, 90-day, and 360-day all-cause mortality in different groups in MIMIC IV database.


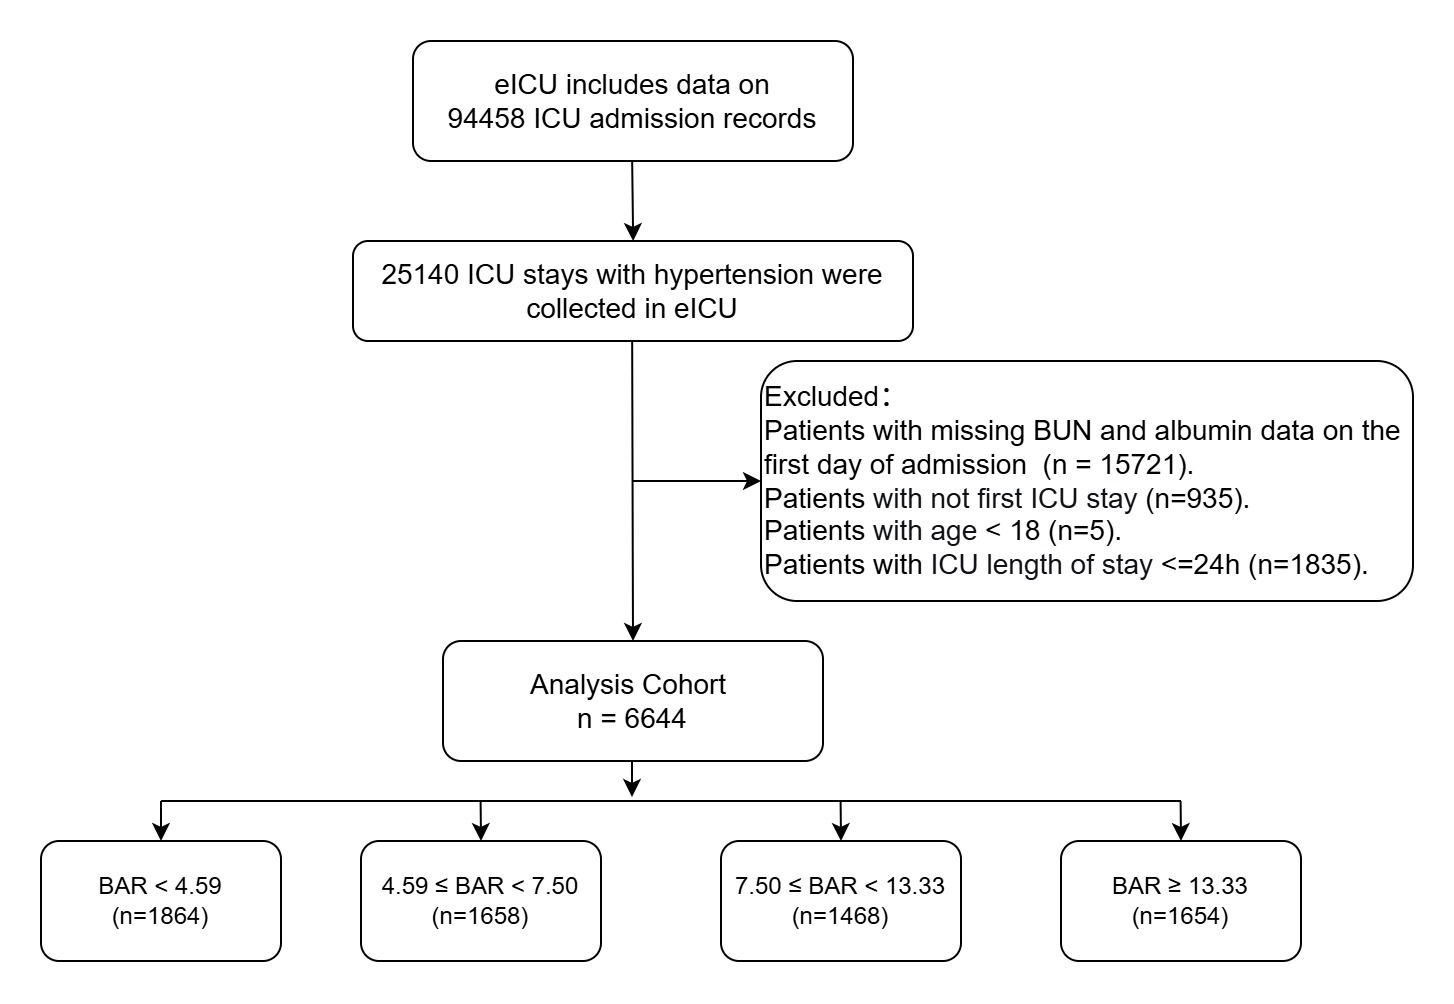


**Figure S2.** Flowchart of study participants in eICU 2.0 database.

**
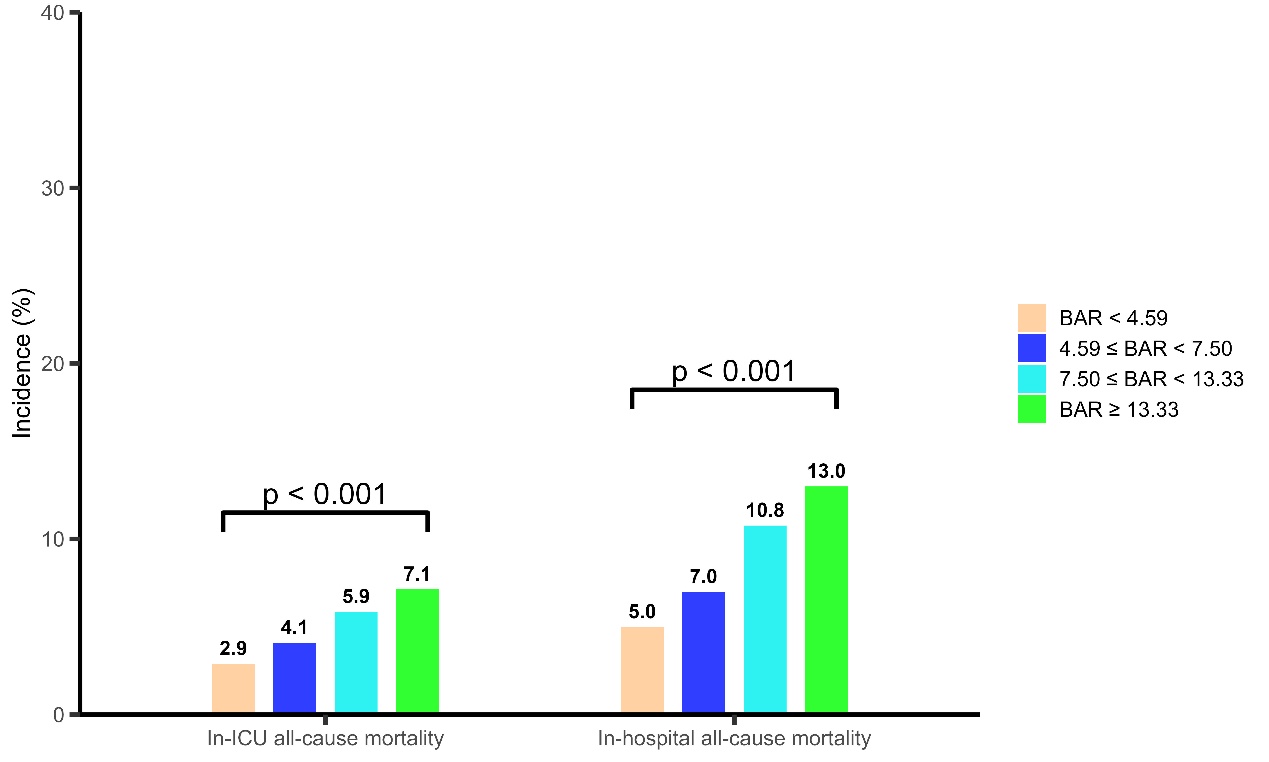
**

**Figure S3.** The 30-day, 90-day, and 360-day all-cause mortality in different groups in eICU 2.0 database.
